# Supplementary material for: Coordination driven axial chirality in a microporous solid assembled from an achiral linker via in situ C–N coupling
Source: Royal Society of Chemistry journal article supplement (doi:10.1039/c1cc13877d), 2011-01-01
Supplement: c1cc13877d.pdf [file c1cc13877d.pdf]

# Supporting Information

## Coordination driven axial chirality in a microporous solid assembled from an achiral linker *via in situ* C-N coupling

Prakash Kanoo,<sup>a</sup> Ritesh Halder,<sup>b</sup> Soumya T. Cyriac<sup>a</sup> and Tapas Kumar Maji<sup>ab\*</sup>

<sup>a</sup>*Molecular Materials Laboratory, Chemistry and Physics of Materials Unit, Jawaharlal Nehru Centre for Advanced Scientific Research, Jakkur, Bangalore – 560064, Fax: (+91) 80-2208-2760*

*\*E-mail: tmaji@jncasr.ac.in*

<sup>b</sup>*New Chemistry Unit, Jawaharlal Nehru Centre for Advanced Scientific Research, Jakkur, Bangalore - 560064*

## Experimental Section:

**Materials:** All the reagents and solvents employed were commercially available and used as supplied without further purification.  $\text{Zn}(\text{NO}_3)_2 \cdot 6\text{H}_2\text{O}$ ,  $\text{Cd}(\text{NO}_3)_2 \cdot 6\text{H}_2\text{O}$  and *trans*-glutaconic acid were obtained from Aldrich Chemical Co. 4,4'-azobipyridine has been synthesised following literature procedure.<sup>1</sup>

**Synthesis of  $\{\text{Zn}(\text{Z-dhpe}) \cdot 3\text{H}_2\text{O} \cdot \text{EtOH}\}_n$  (1) and  $\{\text{Cd}_2(\text{Z-dhpe})_2 \cdot 7\text{H}_2\text{O} \cdot 2\text{EtOH}\}_n$  (2):** An aqueous solution (50 mL) of disodium *trans*-glutaconate ( $\text{Na}_2\text{tga}$ ) (1mmol, 0.174 g) was mixed with ethanolic solution (50 mL) of 4,4'-azobipyridine (azpy) (0.5 mmol, 0.078 g) and the resulting solution was stirred for 20 min. to mix well.  $\text{Zn}(\text{NO}_3)_2 \cdot 6\text{H}_2\text{O}$  (1mmol, 0.297 g) was dissolved in 100 mL water and 2 mL of this Zn(II) solution was slowly and carefully layered with the above mixed ligand solution using 1 mL buffer (1:2 of water and EtOH) solution. Good quality orange colour block shaped crystals were isolated after 45 days. The crystals were separated and washed with EtOH/water (1:1) mixture and air dried. (Yield 53 %). Anal. calcd. for  $\text{C}_{17}\text{H}_{24}\text{ZnN}_4\text{O}_8$ : C, 42.74; H, 5.06; N, 11.73. Found: C, 42.31; H, 4.61; N, 11.02 %. FT-IR (KBr pellet, 4000-400  $\text{cm}^{-1}$ ): 3430(s), 3244(s), 1612(s), 1445(m), 1114(m). Crystals of **2** were prepared by similar procedure.

## Physical Measurements:

Elemental analysis was carried out using a Thermo Scientific Flash 2000 CHN analyzer. IR spectrum was recorded on a Bruker IFS 66v/S spectrophotometer using the KBr pellets in the region 4000-400  $\text{cm}^{-1}$ . Thermogravimetric analysis (TGA) was carried out on a METTLER TOLEDO TGA850 instrument in the temperature range of 30 - 600 °C under nitrogen atmosphere (flow rate of 50 mL  $\text{min}^{-1}$ ) at a heating rate of 5 °C  $\text{min}^{-1}$ . Powder X-ray diffraction (PXRD) pattern in different state of the samples were recorded on a Bruker D8 Discover instrument using Cu-K $\alpha$  radiation.  $^1\text{H}$  and  $^{13}\text{C}$  NMR were recorded on a Bruker AV-400 spectrometer (in  $\text{DCl}/[\text{D}_6]\text{-DMSO}$ , TMS as internal standard). Mass spectrum was recorded on a Bruker Ultraflex II MALDI/TOF spectrometer. The adsorption isotherms for  $\text{N}_2$  (at 77 K) and  $\text{CO}_2$ ,  $\text{N}_2$ ,  $\text{H}_2$ , Ar,  $\text{O}_2$  (at 195 K) gases were measured in a QUANTACHROME QUADRASORB SI analyzer. A known weight (100-125 mg) of the as-synthesized sample was placed in the sample cell, then, prior to measurements, the sample was dried under high vacuum at 373 K for 16 h to remove the guest molecules. The adsorbate was charged into the sample tube, and then the change of the pressure was monitored and the degree of adsorption was determined by the decrease in pressure at the equilibrium state. All operations were computer-controlled and automatic.

**Single crystal X-ray diffraction:** X-ray single crystal structural data were collected on a Bruker Smart-CCD diffractometer equipped with a normal focus, 2.4 kW sealed tube X-ray source with graphite monochromated Mo-K $\alpha$  radiation ( $\lambda = 0.71073$  Å) operating at 50 kV and 30 mA. The programme SAINT<sup>2</sup> was used for integration of diffraction profiles and absorption correction was made with SADABS<sup>3</sup> programme. The structures were solved by SIR 92<sup>4</sup> and refined by full matrix least square method using SHELXL-97<sup>5</sup>. All the hydrogen atoms were fixed by HFIX and placed in ideal positions. Potential solvent accessible area or void space was calculated using the PLATON<sup>6</sup> multipurpose crystallographic software. All calculations were carried out using SHELXL-97<sup>5</sup>, PLATON<sup>6</sup> and WinGX<sup>7</sup> system, Ver 1.70.01.

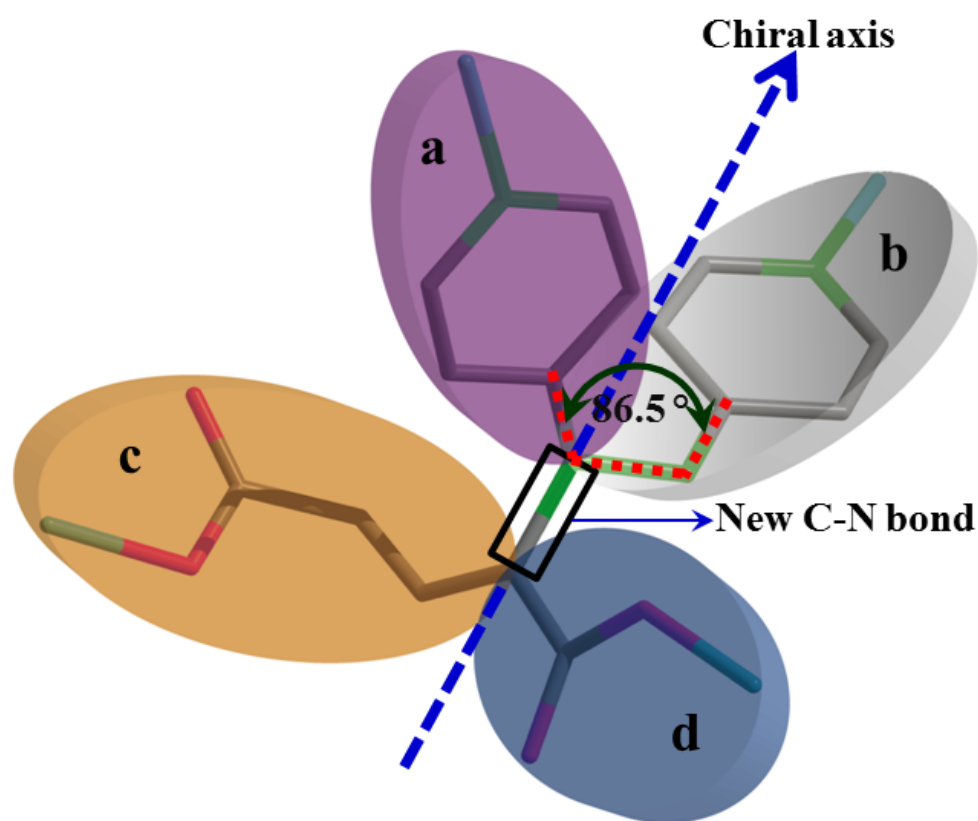

**Fig. S1** The loss of molecular symmetry of azpy because of the change in hybridization of two nitrogen atoms N2 and N3 from  $sp^2$  to  $sp^3$  via C-N coupling provides the sufficient angle ( $\sim 86.5^\circ$ ) to the pyridyl rings 'a' and 'b' to bent away from each other, which gives rise to a distorted tetrahedral geometry of the **Z-dhpe** ligand. Coordination of four different groups (a-d) to four tetrahedral Zn(II) atoms fridges the ligand and gives rise to chirality in the framework. We propose that the chiral axis passes through the newly formed C-N bond (in black rectangle).

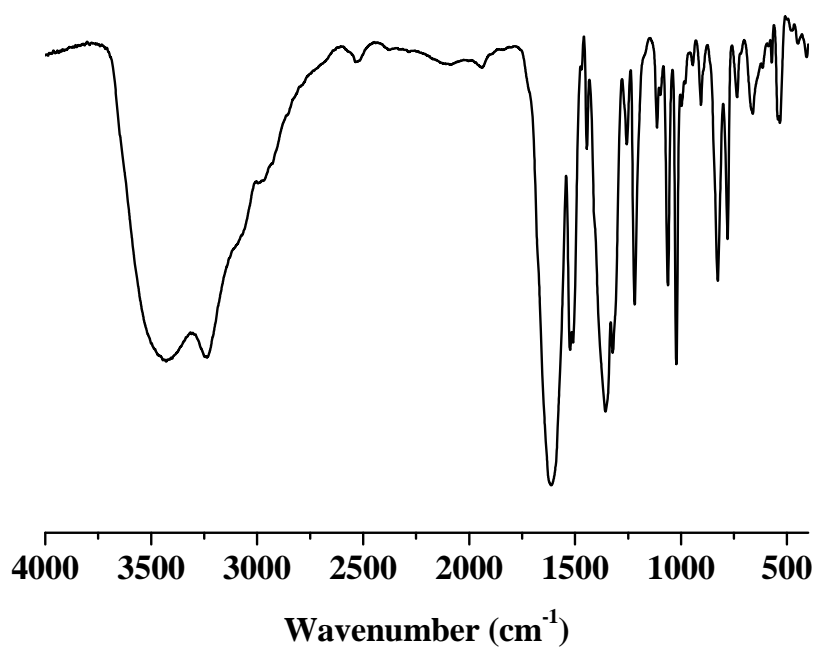

**Fig. S2** IR spectrum of compound **1**.

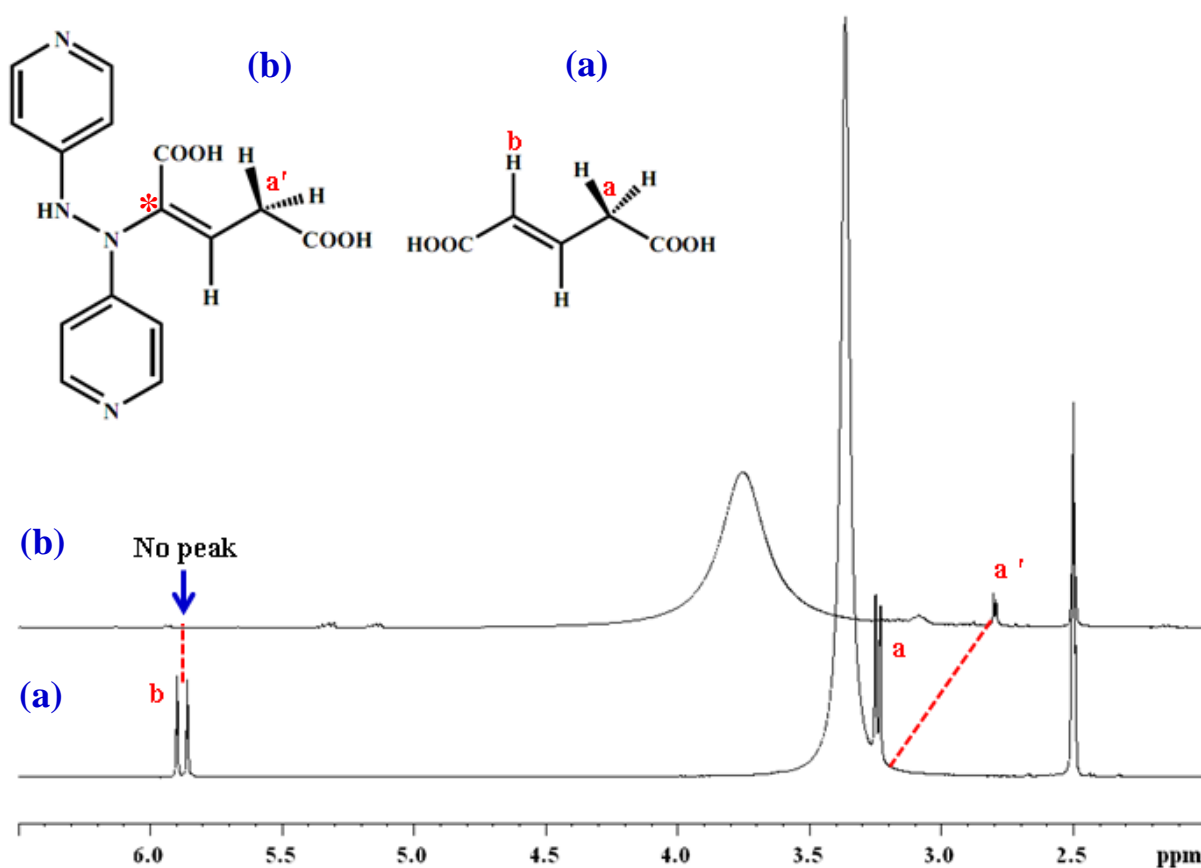

**Fig. S3**  $^1\text{H}$  NMR spectra of digested compound **1** ( $\text{DCI}/[\text{D}_6]\text{-DMSO}$ ). Absence of proton in \*marked carbon atom and chemical shift of **a** protons to **a'** confirm the C-N coupling. Dotted lines represent correlation of the peaks.

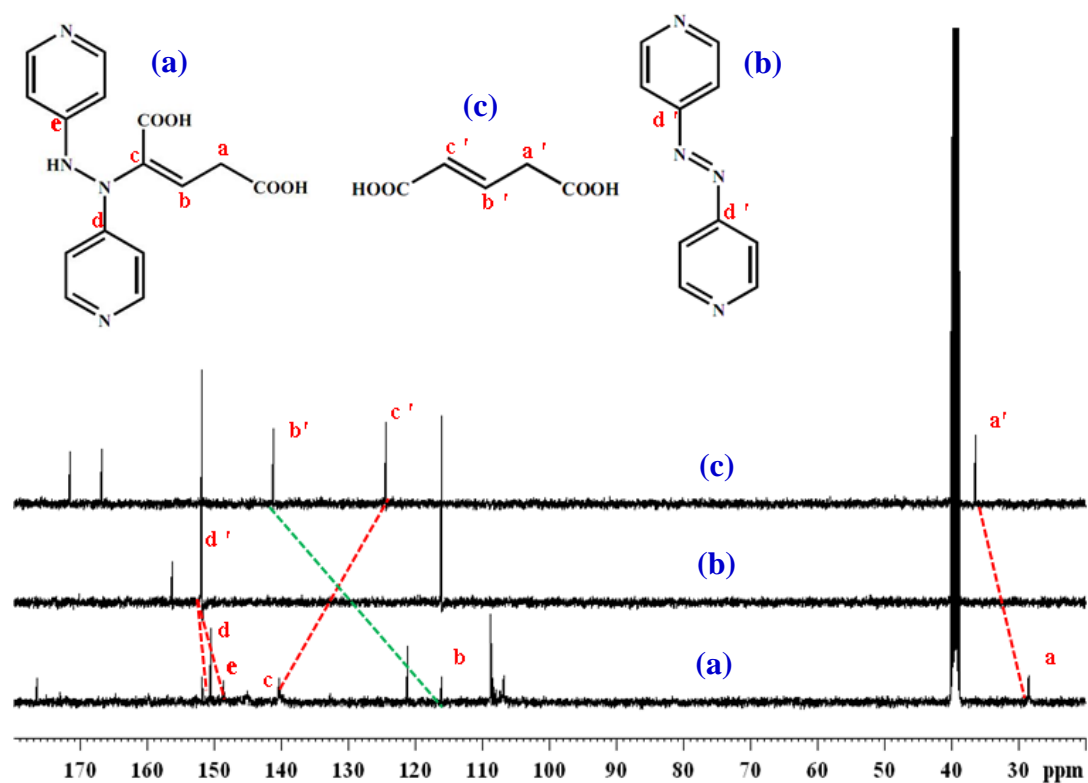

**Fig. S4**  $^{13}\text{C}$  NMR spectra of digested compound **1** (DCI/ $\text{D}_6$ -DMSO). Chemical shifts of **a**, **b**, **c** and **d** carbons and appearance of a new peak **e** confirm the formation of **Z-dhpe** via C-N coupling.

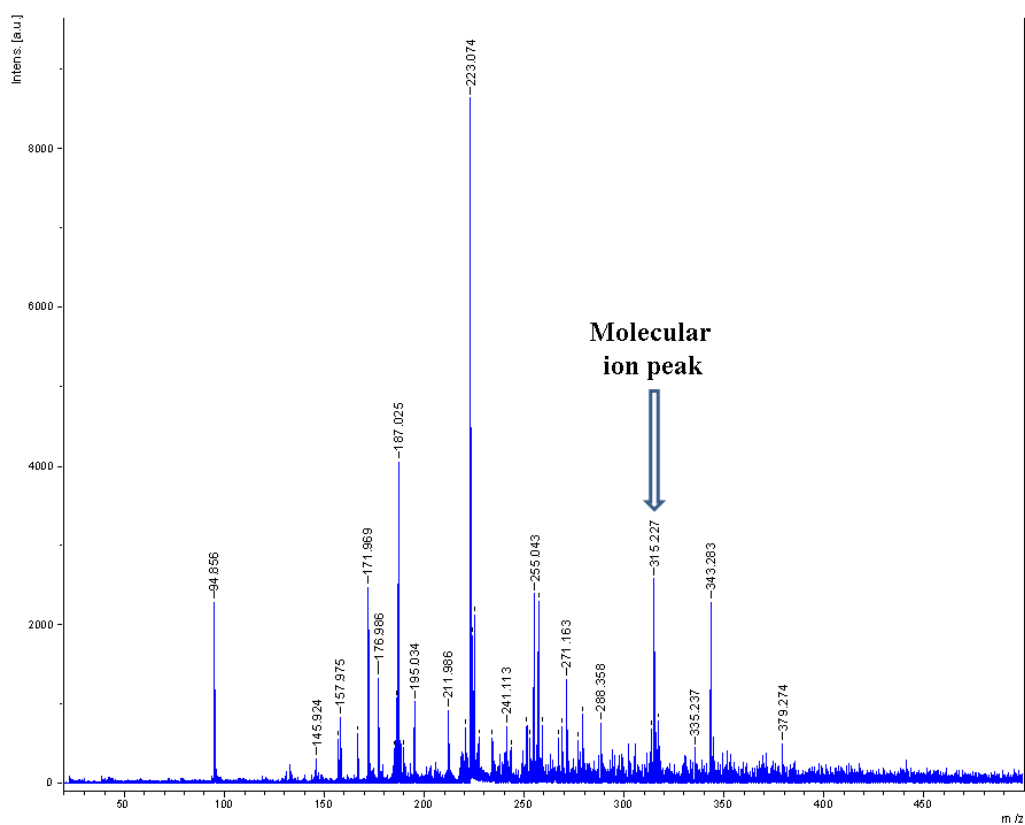

**Fig. S5** ESI-MS analysis of digested compound **1**.

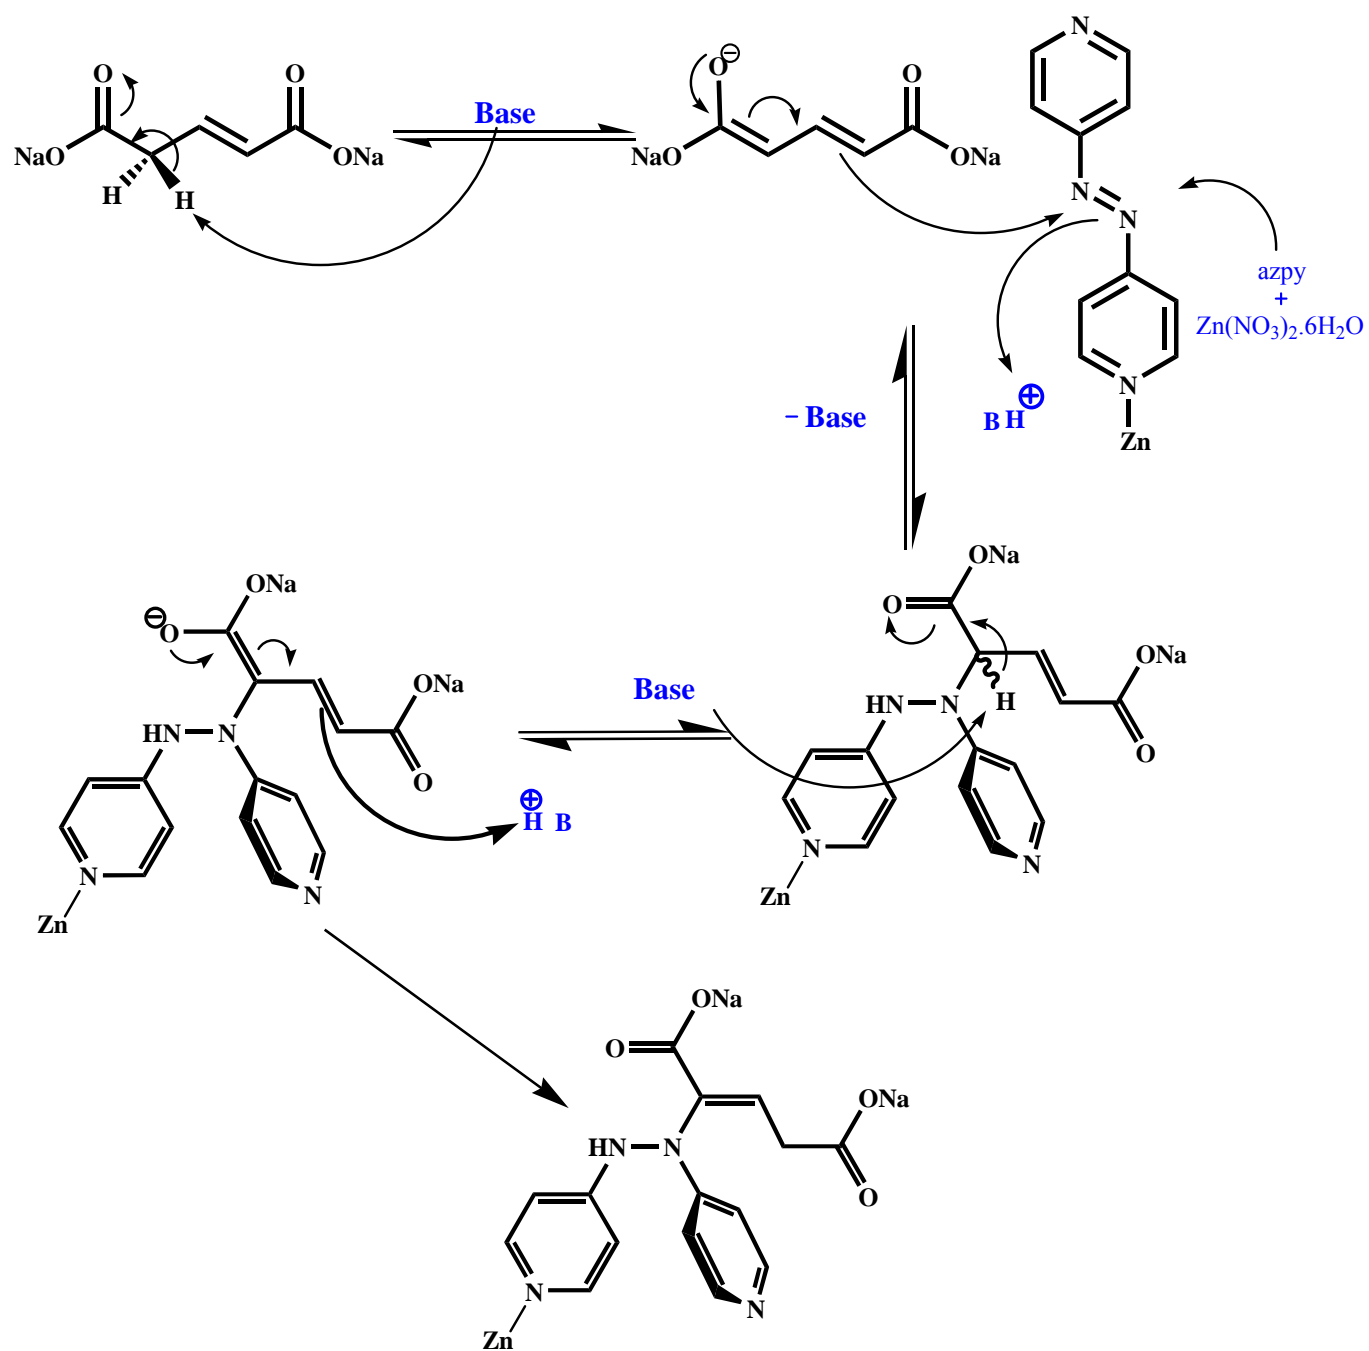

**Scheme S1** Proposed mechanism for the formation of the ligand **Z-dhpe**.

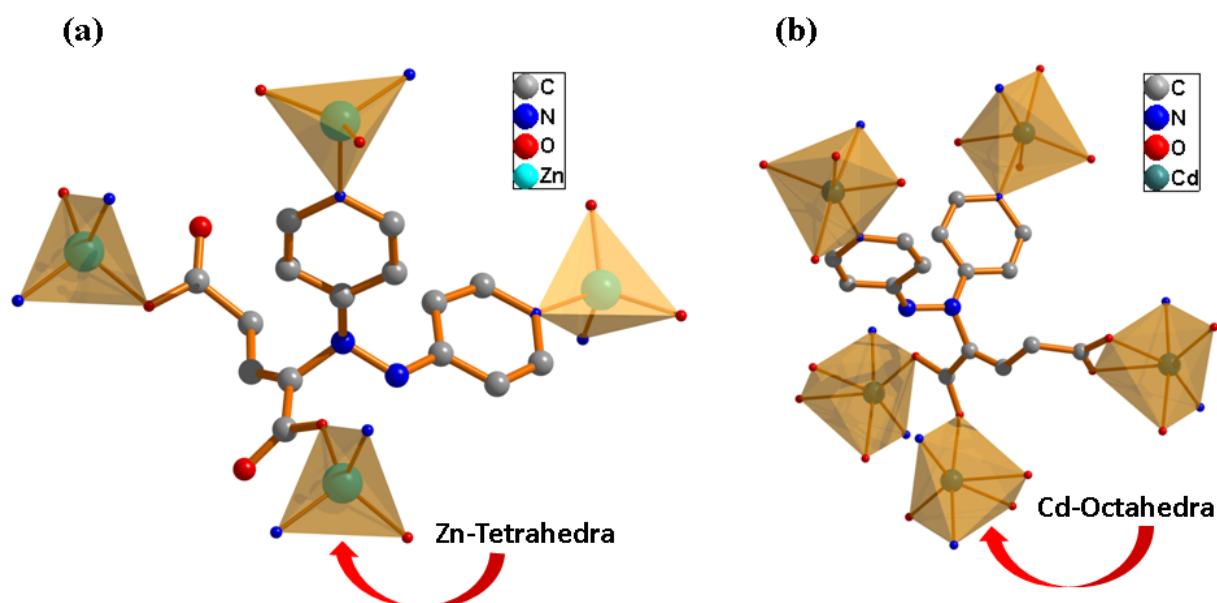

**Fig. S6** Different coordination modes of the bi-functional ligand **Z-dhpe**: (a) Tetrahedral with Zn(II) in **1** and (b) Octahedral with Cd(II) in **2**.

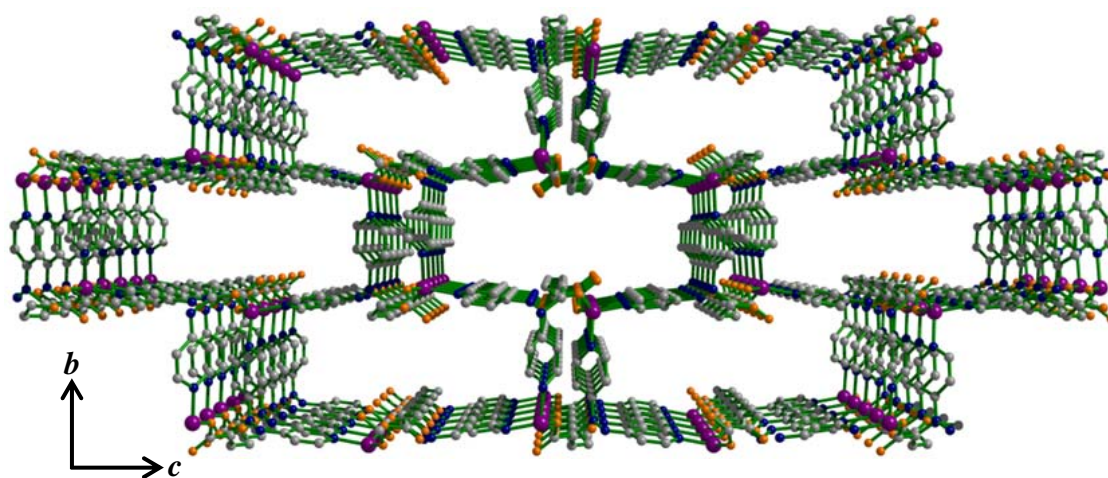

**Fig. S7** Perspective view of the guest excluded 3D framework of **1** shows large 1D channels along crystallographic *a* direction.

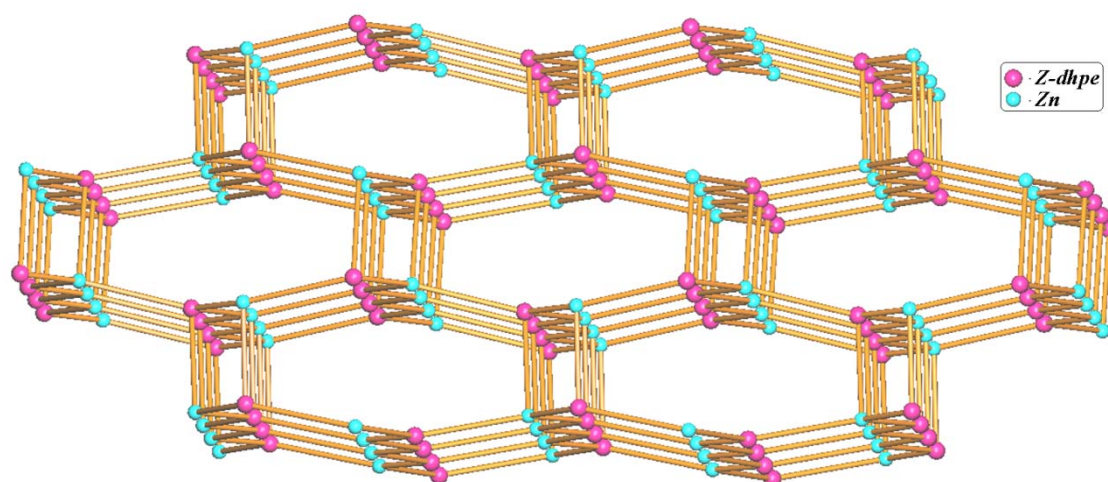

**Fig. S8** Topological view of 4-connected uninodal net in **1**.

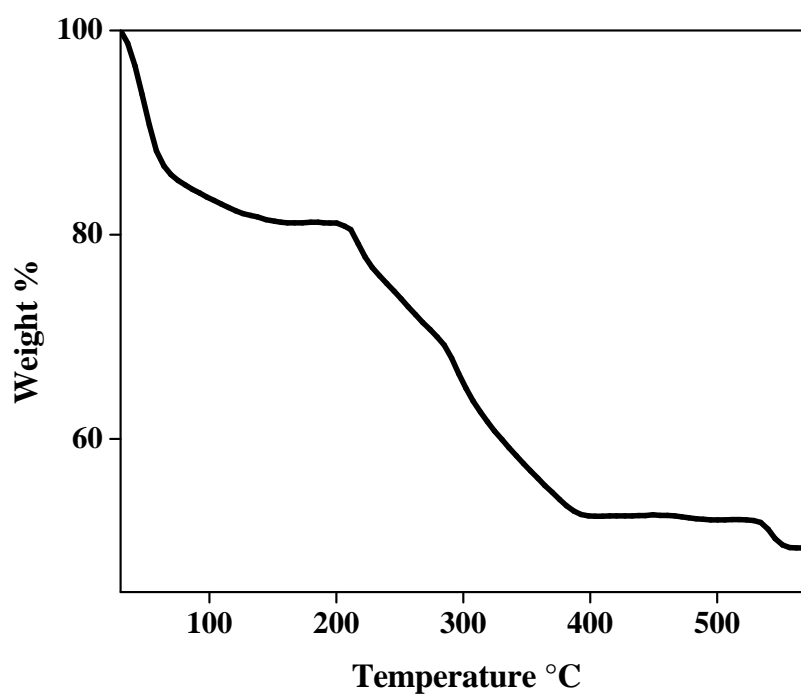

**Fig. S9** Thermogravimetric analysis curve of **1** recorded in the 30 – 600 °C temperature range under nitrogen flow.



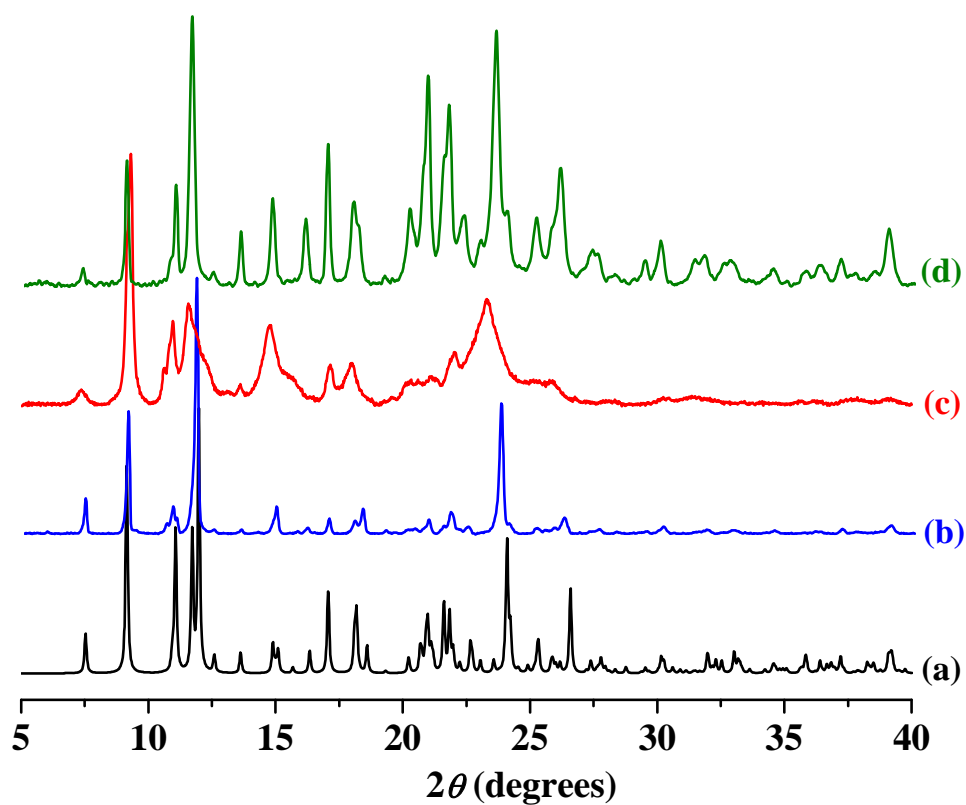

**Fig. S10** PXRD pattern of the framework **1**: (a) simulated; (b) assynthesized; (c) heated at 100 °C and (d) resolved. The very well correspondence between simulated and assynthesized pattern indicates the high purity of the synthesized sample.

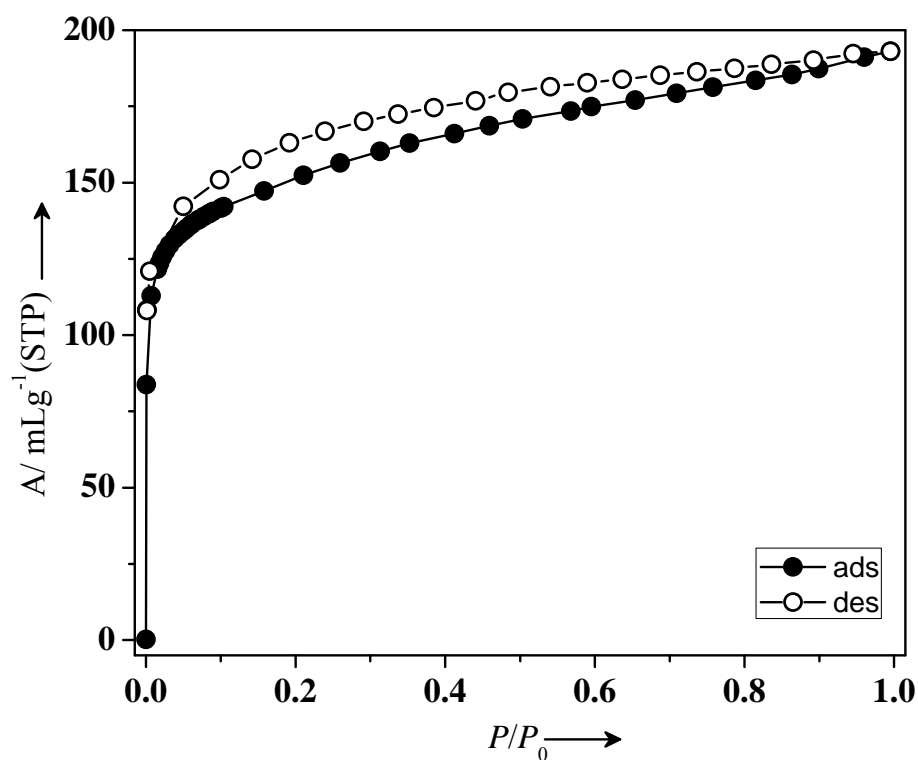

**Fig. S11**  $N_2$  adsorption-desorption isotherm at 77 K. Adsorption and desorption data are represented by open and filled symbols, respectively.

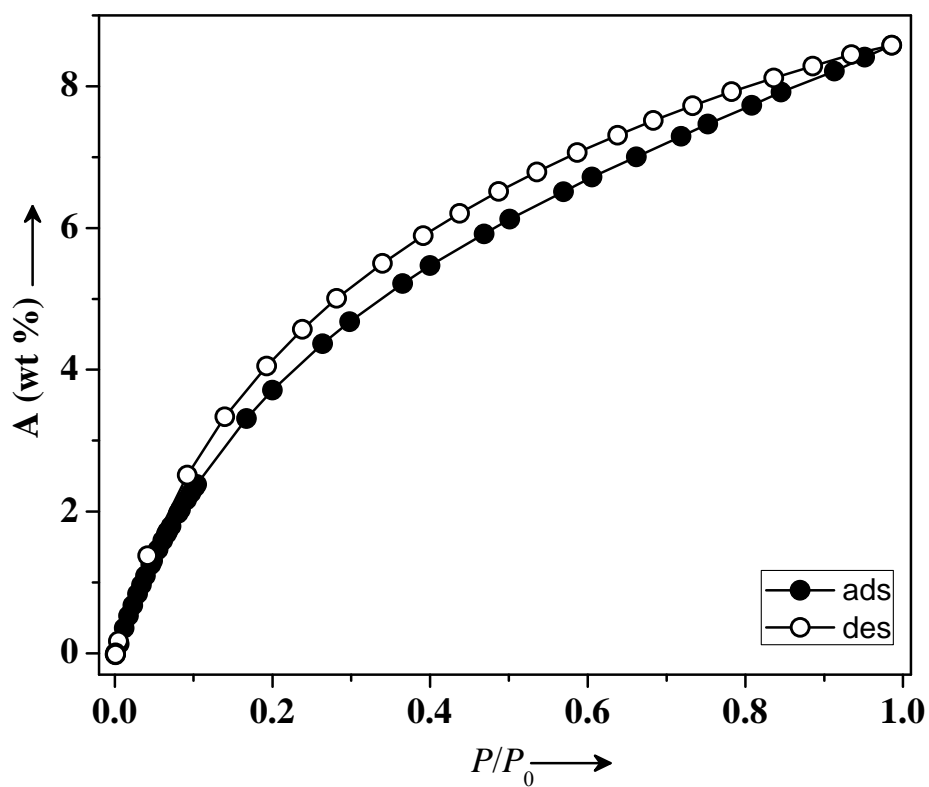

**Fig. S12** CO<sub>2</sub> adsorption-desorption isotherm at 298 K. Adsorption and desorption data are represented by open and filled symbols, respectively.

**Table S1.** Reported *in situ* reactions in MOFs and their properties along with the one observed in this work.

| Entry | <i>In situ</i> ligand/ coupling type  | Reaction Condition | BET surface area (m <sup>2</sup> g <sup>-1</sup> ) | CO <sub>2</sub> uptake cc g <sup>-1</sup> | Other properties                                       | Ref.           |
|-------|---------------------------------------|--------------------|----------------------------------------------------|-------------------------------------------|--------------------------------------------------------|----------------|
| 1     | Tetrazolate ligand                    | Hydrothermal       | ---                                                | ---                                       | ---                                                    | 4a (main text) |
| 2     | C-C and C-N coupling                  | Hydrothermal       | ---                                                | ---                                       | ---                                                    | 4b (main text) |
| 3     | 2-methylimidazolate-4-amide-5-imidate | Solvothermal       | 802                                                | 48 at 298 K                               | ---                                                    | 8a             |
| 4     | Tetrazolate ligand                    | Solvothermal       | ---                                                | ---                                       | Photoluminescence                                      | 8b             |
| 5     | 5-methyl-1H-tetrazole                 | Hydrothermal       | Negligible                                         | ---                                       | Anion sensing                                          | 8c             |
| 6     | Oxidation of trimethyl pyridine       | Hydrothermal       | ---                                                | ---                                       | Magnetism                                              | 8d             |
| 7     | 2+2 cycloaddition, C-C bond           | RT                 | ---                                                | ---                                       | ---                                                    | 8e             |
| 8     | Z-dhpe                                | RT                 | 870                                                | 44 at 298 K and 223 at 195 K              | Selective CO <sub>2</sub> uptake at 195K and Chirality | This Work      |

**Table S2.** Summary of crystal data and refinement results.

| Samples     | Space group                                           | <i>a</i> (Å) | <i>b</i> (Å) | <i>c</i> (Å) | <i>R</i> | <i>R<sub>w</sub></i> | Flack parameter |
|-------------|-------------------------------------------------------|--------------|--------------|--------------|----------|----------------------|-----------------|
| Crystal 1   | <i>P</i> 2 <sub>1</sub> 2 <sub>1</sub> 2 <sub>1</sub> | 8.741(5)     | 14.796(5)    | 19.340(5)    | 0.086    | 0.2689               | 0.00(3)         |
| Crystal 1a  | <i>P</i> 2 <sub>1</sub> 2 <sub>1</sub> 2 <sub>1</sub> | 8.7423(6)    | 14.7183(11)  | 19.3742(15)  | 0.0843   | 0.2300               | 0.01(6)         |
| Crystal 1b  | <i>P</i> 2 <sub>1</sub> 2 <sub>1</sub> 2 <sub>1</sub> | 8.7726(4)    | 14.7582(9)   | 19.3159(10)  | 0.0797   | 0.2428               | 0.02(4)         |
| Crystal 1c* | <i>P</i> 2 <sub>1</sub> 2 <sub>1</sub> 2 <sub>1</sub> | 8.7611(8)    | 14.7839(16)  | 19.353(2)    | 0.0811   | 0.2286               | 0.05(5)         |
| Crystal 1d* | <i>P</i> 2 <sub>1</sub> 2 <sub>1</sub> 2 <sub>1</sub> | 8.7562(6)    | 14.8244(11)  | 19.3329(14)  | 0.0798   | 0.2285               | -0.01(5)        |

Crystals with and without \*mark have opposite handedness.

## References:

- (a) E. V. Brown, G. R. Granneman, *J. Am. Chem. Soc.*, 1975, **97**, 621; (b) O. Theilmann, W. Saak, D. Haase, R. Beckhaus, *Organometallics*, 2009, **28**, 2799.
- SAINT+, 6.02 ed.; Bruker AXS: Madison, WI, 1999.
- G. M. Sheldrick, SADABS, Empirical Absorption Correction Program; University of Göttingen, Göttingen, Germany, 1997.
- Altomare, G. Cascarano, C. Giacovazzo, A. Gualaradi, *J. Appl. Crystallogr.*, 1993, **26**, 343.
- G. M. Sheldrick, SHELXL 97, *Program for the Solution of Crystal Structure*, University of Göttingen, Germany, 1997.
- A. L. Spek, *J. Appl. Crystallogr.*, 2003, **36**, 7.
- L. J. Farrugia, WinGX - A Windows Program for Crystal Structure Analysis, *J. Appl. Crystallogr.*, 1999, **32**, 837.
- (a) F. Debatin, A. Thomas, A. Kelling, N. Hedin, Z. Bacsik, I. Senkovska, S. Kaskel, M. Junginger, H. Muller, U. Schilde, C. Jager, A. Friedrich and H. J. Holdt, *Angew. Chem., Int. Ed.*, 2010, **49**, 1258; (b) M. Li, Z. Li and D. Li, *Chem. Commun.*, 2008, 3390; (c) Y. C. Qiu, H. Deng, J. X. Mou, S. H. Yang, M. Zeller, S. R. Batten, H. H. Wue and J. Lie, *Chem. Commun.*, 2009, 5415; (d) C. J. Li, Z. J. Lin, L. Yun, Y. L. Xie, J. D. Leng, Y. C. Ou and M. L. Tong, *CrystEngComm*, 2010, **12**, 425; (e) A. J. Blake, N. R. Champness, S. S. M. Chung, W.-S. Li and M. Schröder, *Chem. Commun.*, 1997, 1675.
